# Supplementary material for: Relationship Dysfunction in Couples When One Partner Is Diagnosed with Borderline Personality Disorder: Findings from a Pilot Study
Source: MDPI journal article supplement (doi:10.3390/bs13030253), 2023-03-13
Supplement: s1 [file s1]

Figure S1. Attachment Parameters: Marginal Means & Significance.

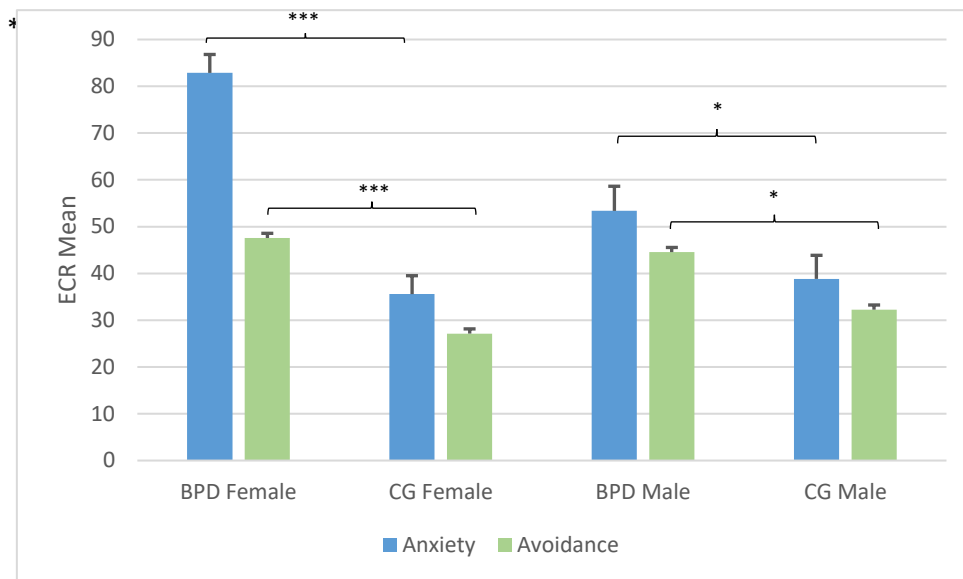

Note: ECR = Experiences in Close Relationships; BPD = Borderline Personality Disorder; CG = Control Group. \* =  $p < 0.05$ ; \*\*\* =  $p < 0.001$ .

Figure S2. Overall CM Load, Sexual Abuse, & Experience of Inconsistency: Marginal Means & Significance.

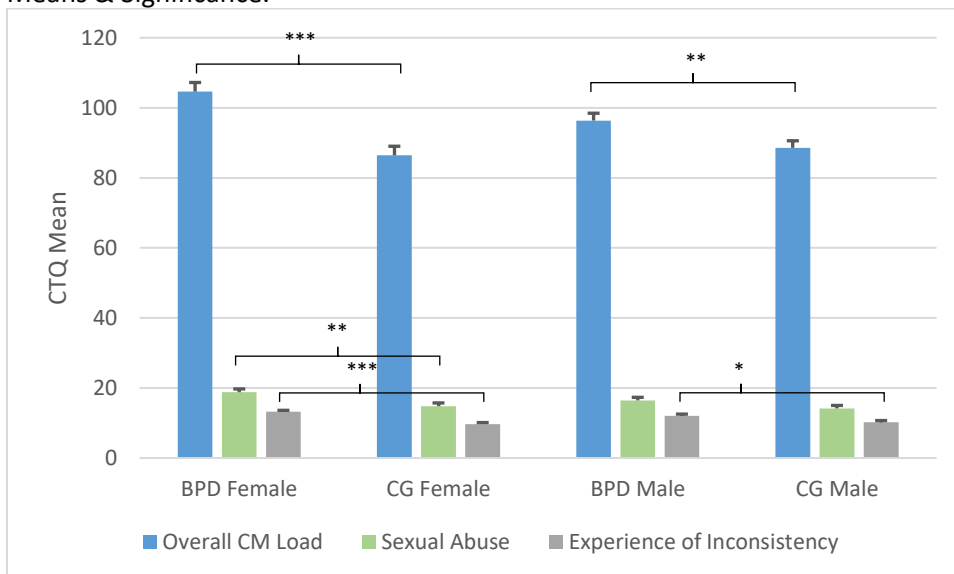

Note: CTQ = Childhood Trauma Questionnaire; BPD = Borderline Personality Disorder; CG = Control Group; Overall CM Load = Overall Childhood Maltreatment Load. \* =  $p < 0.05$ ; \*\* =  $p < 0.01$ ; \*\*\* =  $p < 0.001$ .

Figure S3. Physical Abuse and Physical Neglect: Marginal Means & Significance.

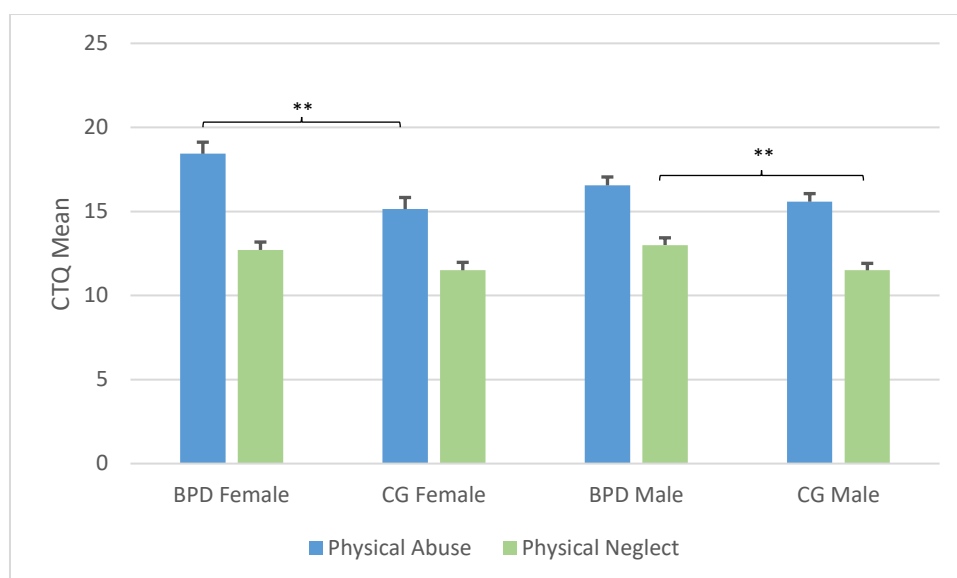

Note: CTQ = Childhood Maltreatment Questionnaire; BPD = Borderline Personality Disorder; CG = Control Group. \*\* =  $p < 0.01$ .

Figure S4. Emotional Abuse and Emotional Neglect: Marginal Means & Significance.

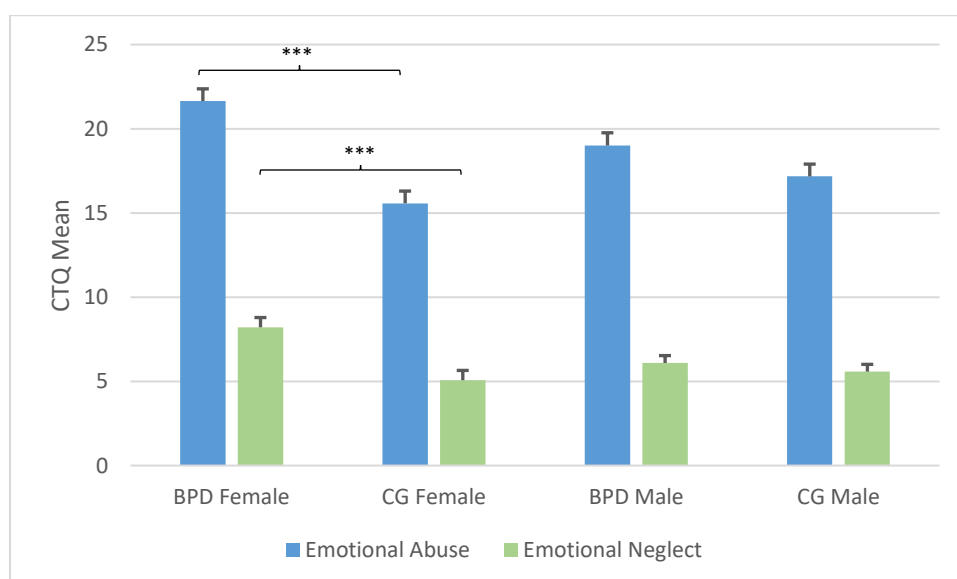

Note: CTQ = Childhood Maltreatment Questionnaire; BPD = Borderline Personality Disorder; CG = Control Group. \*\*\* =  $p < 0.001$ .

Figure S5. Neuroticism & Extraversion: Marginal Means & Significance.

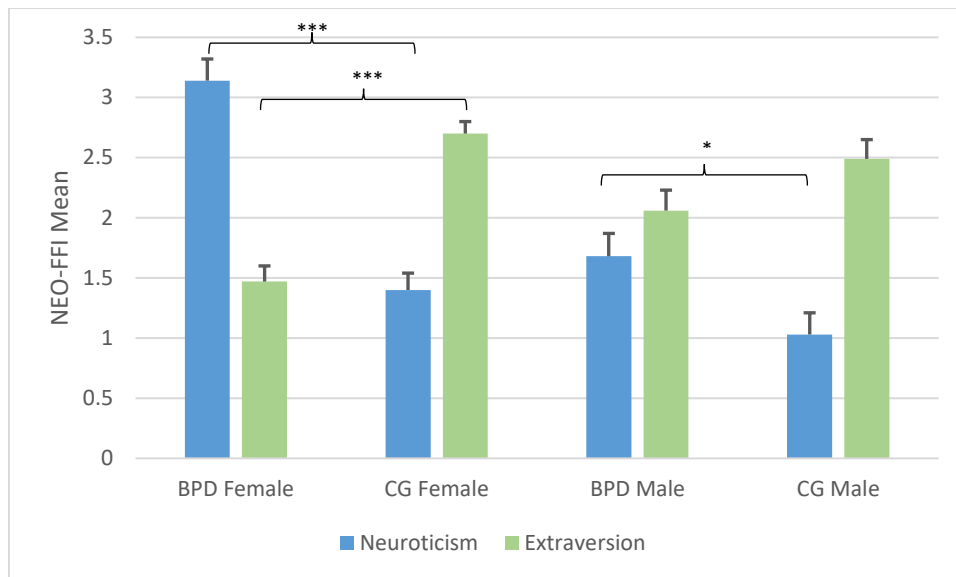

Note: NEO-FFI = NEO Five-Factor-Inventory; BPD = Borderline Personality Disorder; CG = Control Group. \* =  $p < 0.05$ ; \*\*\* =  $p < 0.001$ .

Figure S6. Openness, Conscientiousness, and Agreeableness: Marginal Means & Significance.

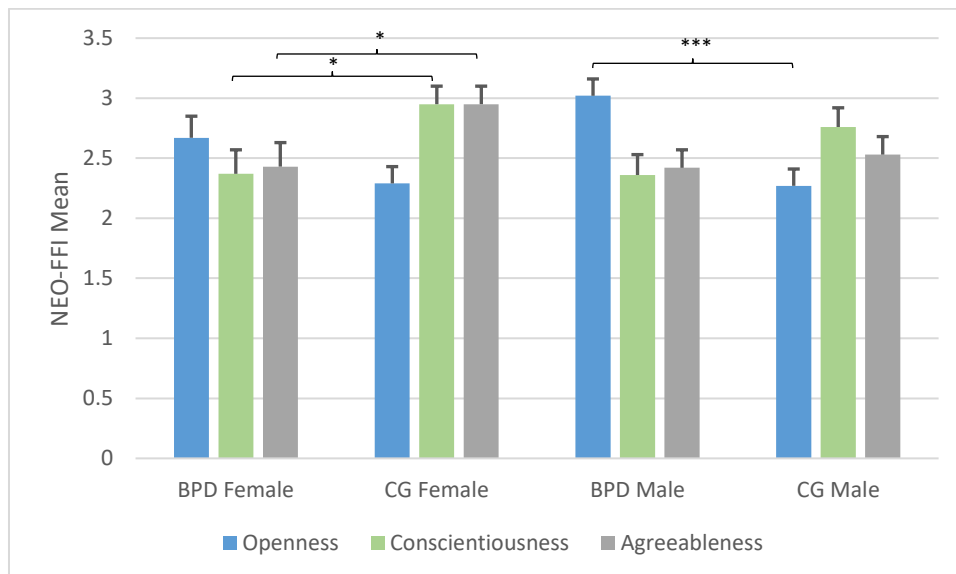

Note: NEO-FFI = NEO Five-Factor-Inventory; BPD = Borderline Personality Disorder; CG = Control Group. \* =  $p < 0.05$ ; \*\*\* =  $p < 0.001$ .
